# Supplementary material
Source: PubMed Central journal article supplement (PMC4284590)
Supplement: pnas.201413209SI.pdf [file pnas.201413209SI.pdf]

# Supporting Information

Chouikha and Hinnebusch 10.1073/pnas.1413209111

## SI Materials and Methods

**Bacterial Mutagenesis.** Deletion of the *Yersinia pseudotuberculosis* and *Yersinia enterocolitica* urease cluster (URE, ~6 kb) or *ureD* gene (~1 kb) (Fig. 2B) was performed by allelic exchange using pCVD442 (1) containing a Km resistance cassette flanked with long-homology sequences of the target DNA (2). Briefly, the Km cassette and its flanking FLP recognition target (FRT) sites were amplified from the pKD4 plasmid (3) with primer pair pKD4-KmF/pKD4-KmR (Table S2). Long-flanking regions (~500 bp) upstream and downstream of the target sequence were amplified using the primer pairs Fup URE/Rup URE-Km and Fdown URE-Km/Rdown URE for the URE cluster deletion and Fup *ureD* /Rup *ureD*-Km and Fdown URE-Km /Rdown URE for the *ureD* deletion (Table S2 and Fig. 2B).

The conjugative knock-out plasmids, pCVD- $\Delta$ ureD:: Km and pCVD- $\Delta$ URE:: Km (Table S4), were introduced into *Escherichia coli* S17-1  $\lambda$ -pir and transferred to *Y. pseudotuberculosis* and *Y. enterocolitica* via conjugation. Positive transconjugants, in which the deletion of the URE cluster and the *ureD* gene had occurred, were checked by urease activity assays and by PCR using primers *ureF* F/R and/or *ureD* F/R. The correct insertion of the Km cassette was verified with primers pairs encompassing one extremity of the Km cassette (k1 or kt-c) and the DNA region adjacent to the target gene (Fup *ureD*, Fup URE, and Rdown URE).

**Site-Directed Mutagenesis.** *Yersinia pestis* KIM6+ urease revertants were generated by overlap extension PCR as described (4, 5). *Y. pestis* KIM6+ genomic DNA was used as a template for PCR amplification. The primers used to delete a single guanidine residue from a G-rich region in the *Y. pestis* KIM6+ *ureD* gene (Fig. 2B) are listed in Table S2, with the degenerate primers (*ureD $\Delta$ G KIM-F/R) containing the mutation of interest sharing complementary sequence. In the first round of PCR, two ~500-bp fragments of *ureD* were amplified using the primer pairs Fup *ureD $\Delta$ G/*ureD $\Delta$ G KIM-R and *ureD $\Delta$ G KIM-F/ Rdown *ureD $\Delta$ G KIM. The generated PCR products were used as template DNA for the second PCR using the primers Fup *ureD $\Delta$ G/Rdown *ureD $\Delta$ G KIM. The resulting amplified ~1-kb fragment was gel-purified and cloned into the SmaI site of pCVD442. The resulting recombinant plasmid (pCVD-*ureD $\Delta$ G<sub>KIM6+</sub>) was checked by endonuclease restriction and used to introduce the mutation into *Y. pestis* KIM6+********

by conjugation as described in the previous section. Revertants were selected according to their ability to hydrolyze urea on modified urea segregation agar (MUSA) plates (6) and confirmed by sequencing using primers *ureD* seqF/R (Table S2).

**Transcomplementation of Urease-Negative Strains.** Before complementation of *Y. pseudotuberculosis* IP32953  $\Delta$ URE (IP $\Delta$ URE), the Km cassette was cured by homologous recombination at the FRT sites mediated by the FLP recombinase carried on the plasmid pCP20 (7) as described (3). The Km cassette excision was verified by streaking isolated colonies simultaneously on LB agar plates with or without Km and by PCR using primers FupURE/RdownURE. Complementation plasmid pWKS-URE<sub>pstb</sub> was constructed by ligating a PCR product encompassing the entire *Y. pseudotuberculosis* urease cluster plus ~500 bp of upstream and downstream sequence into the *EcoRV* site of pWKS130 (Table S4). The plasmid pWKS-URE<sub>pstb</sub> was transformed in *E. coli* TOP10 (Life Technologies) and transformants were screened by PCR for the presence of all urease genes (Fig. 2B; see Table S2 for primers used) and selected based on their ability to hydrolyze urea on MUSA plates. Plasmid pWKS-URE<sub>pstb</sub> isolated from positive clones was transformed into *Y. pseudotuberculosis* IP $\Delta$ URE<sub>KmS</sub> and *Y. pestis* KIM6+.

Complementation of the nonfunctional *ureD* gene was performed by introducing the plasmid pCR*ureG-D* containing the promoter and bicistronic *ureG* and *ureD* genes of IP32953 cloned in the high-copy plasmid pCR XL-TOPO TA cloning into *Y. pestis*.

**Mathematical Modeling.** Assuming that the population of susceptible hosts is not limiting, the flea density per host ( $m$ ) required to sustain a plague transmission cycle (*Y. pestis* successfully transmitted from a single infected animal to at least one new host;  $R_0 = 1$ ) can be estimated from a modification of Macdonald's equation (8),  $m = r/abp^n$ , with  $1/r$  being the duration of infectivity of the primary host and  $a$ ,  $b$ ,  $p$ , and  $n$  being vector competence factors. The effect of urease-related toxicity on the vector-specific parameters corresponding to biofilm-dependent transmission by blocked *X. cheopis* fleas is indicated in Table S3. For wild-type (urease-negative) *Y. pestis* the threshold flea density is estimated to be 3, but this threshold increases to 6 for a urease-positive clone.

1. Donnenberg MS, Kaper JB (1991) Construction of an *ae* deletion mutant of enteropathogenic *Escherichia coli* by using a positive-selection suicide vector. *Infect Immun* 59(12):4310–4317.
2. Derbise A, Lesic B, Dacheux D, Ghigo JM, Carniel E (2003) A rapid and simple method for inactivating chromosomal genes in *Yersinia*. *FEMS Immunol Med Microbiol* 38(2): 113–116.
3. Datsenko KA, Wanner BL (2000) One-step inactivation of chromosomal genes in *Escherichia coli* K-12 using PCR products. *Proc Natl Acad Sci USA* 97(12):6640–6645.
4. Ho SN, Hunt HD, Horton RM, Pullen JK, Pease LR (1989) Site-directed mutagenesis by overlap extension using the polymerase chain reaction. *Gene* 77(1):51–59.
5. Reikofski J, Tao BY (1992) Polymerase chain reaction (PCR) techniques for site-directed mutagenesis. *Biotechnol Adv* 10(4):535–547.
6. Hu LT, Nicholson EB, Jones BD, Lynch MJ, Mobley HL (1990) *Morganella morganii* urease: Purification, characterization, and isolation of gene sequences. *J Bacteriol* 172(6):3073–3080.
7. Cherepanov PP, Wackernagel W (1995) Gene disruption in *Escherichia coli*: TcR and KmR cassettes with the option of Fip-catalyzed excision of the antibiotic-resistance determinant. *Gene* 158(1):9–14.
8. Lorange EA, Race BL, Sebbane F, Hinnebusch BJ (2005) Poor vector competence of fleas and the evolution of hypervirulence in *Yersinia pestis*. *J Infect Dis* 191(11):1907–1912.

**Table S1. 2-DE/mass spectrometry identification of *Y. pseudotuberculosis* membrane-associated proteins that are absent from, differentially expressed, or have a different pI in the *Y. pestis* 2-DE profile (Fig. 2)**

| Spot no. | Accession no. | Gene name          | Gene ID         | Coverage*    | AA <sup>†</sup> | Molecular weight, kDa | Calculated pI | Score <sup>‡</sup> | Description                                                      | % ID to <i>Y. pestis</i> <sup>§</sup> |
|----------|---------------|--------------------|-----------------|--------------|-----------------|-----------------------|---------------|--------------------|------------------------------------------------------------------|---------------------------------------|
| 1        | Q66CY8        | <i>ompC</i>        | YPTB1261        | 36.12        | 371             | 41.0                  | 5.16          | 816.98             | Outer membrane protein C, porin                                  | 99                                    |
| 2        | Q66CY8        | <i>ompC</i>        | YPTB1261        | 31.27        | 371             | 41.0                  | 5.16          | 1,046.76           | Outer membrane protein C, porin                                  | 99                                    |
| 3        | Q66CY8        | <i>ompC</i>        | YPTB1261        | 16.71        | 371             | 41.0                  | 5.16          | 1,450.25           | Outer membrane protein C, porin                                  | 99                                    |
| 4        | Q66CY8        | <i>ompC</i>        | YPTB1261        | 28.03        | 371             | 41.0                  | 5.16          | 1,511.31           | Outer membrane protein C, porin                                  | 99                                    |
| 5        | Q66FD5        | <i>groEL</i>       | YPTB0405        | 62.59        | 548             | 57.4                  | 5.01          | 11,323.09          | 60-kDa chaperonin                                                | 100                                   |
| 6        | Q663Q8        | <i>atpD</i>        | YPTB3967        | 54.35        | 460             | 50.1                  | 5.06          | 5,068.73           | ATP synthase subunit beta                                        | 100                                   |
| 7        | Q663Q8        | <i>atpD</i>        | YPTB3967        | 28.91        | 460             | 50.1                  | 5.06          | 1,127.69           | ATP synthase subunit beta                                        | 100                                   |
| 8        | Q66DA1        | <i>sucB</i>        | YPTB1148        | 24.32        | 407             | 44.3                  | 5.69          | 1,368.55           | Dihydrolipoamide succinyltransferase component of 2-oxoglutarate | 100                                   |
| 9        | Q66FD5        | <i>groEL</i>       | YPTB0405        | 9.36         | 545             | 57.1                  | 5.01          | 279.77             | 60-kDa chaperonin                                                | 100                                   |
| 10       | <b>P52313</b> | <b><i>ureC</i></b> | <b>YPTB2942</b> | <b>11.71</b> | <b>572</b>      | <b>61.0</b>           | <b>5.81</b>   | <b>341.35</b>      | <b>Urease subunit alpha</b>                                      | <b>100</b>                            |
| 11       | Q66EH8        | <i>lpdA</i>        | YPTB0715        | 24.68        | 474             | 50.5                  | 6.11          | 1,291.95           | Dihydrolipoyl dehydrogenase                                      | 100                                   |
| 12       | <b>P52316</b> | <b><i>ureD</i></b> | <b>YPTB2938</b> | <b>13.71</b> | <b>321</b>      | <b>35.7</b>           | <b>6.96</b>   | <b>968.76</b>      | <b>Urease accessory protein UreD</b>                             | <b>99<sup>¶</sup></b>                 |
| 13       | Q664U6        | <i>rpoA</i>        | YPTB3673        | 33.43        | 329             | 36.5                  | 5.06          | 697.36             | RNA polymerase subunit alpha                                     | 100                                   |
| 14       | Q66CY8        | <i>ompC</i>        | YPTB1261        | 27.49        | 371             | 41.0                  | 5.16          | 1,054.05           | Outer membrane protein C, porin                                  | 99                                    |
| 15       | <b>P69993</b> | <b><i>ureG</i></b> | <b>YPTB2939</b> | <b>42.27</b> | <b>220</b>      | <b>24.0</b>           | <b>4.98</b>   | <b>955.35</b>      | <b>Urease accessory protein UreG</b>                             | <b>100</b>                            |
| 16       | Q66BY2        | <i>manX</i>        | YPTB1634        | 23.18        | 302             | 32.9                  | 5.82          | 768.09             | PTS system, mannose-specific                                     | 100                                   |
| 17       | P38399        | <i>ompA</i>        | YPTB1453        | 30.03        | 353             | 37.9                  | 7.27          | 1,511.91           | Outer membrane protein A                                         | 100                                   |
| 18       | P38399        | <i>ompA</i>        | YPTB1453        | 17.56        | 353             | 37.9                  | 7.27          | 1,250.79           | Outer membrane protein A                                         | 100                                   |
| 19       | Q56957        | <i>ail</i>         | YPTB2867        | 22.35        | 179             | 19.8                  | 8.50          | 2,058.25           | Attachment invasion locus protein                                | 99                                    |
| 20       | Q664R9        | <i>bfr</i>         | YPTB3700        | 55.41        | 157             | 18.2                  | 4.87          | 632.50             | Bacterioferritin                                                 | 99                                    |
| 21       | Q66BV7        | <i>ftnA</i>        | YPTB1659        | 21.30        | 169             | 19.2                  | 5.16          | 295.67             | Ferritin                                                         | 99                                    |
| 22       | Q66FA2        | <i>rpsF</i>        | YPTB0438        | 30.91        | 110             | 12.6                  | 5.53          | 955.97             | 30S ribosomal protein S6                                         | 100                                   |
| 23       | Q669E1        | <i>dps</i>         | YPTB2546        | 51.50        | 167             | 18.9                  | 6.29          | 2,930.60           | DNA protection during starvation protein                         | 100                                   |
| 24       | Q66F99        | <i>rplI</i>        | YPTB0441        | 40.67        | 150             | 15.9                  | 6.80          | 2,366.43           | 50S ribosomal protein L9                                         | 100                                   |
| 25       | Q669E1        | <i>dps</i>         | YPTB2546        | 32.34        | 167             | 18.9                  | 6.29          | 553.01             | DNA protection during starvation protein                         | 100                                   |
| 26       | Q56957        | <i>ail</i>         | YPTB2867        | 39.11        | 179             | 19.8                  | 8.50          | 3,264.24           | Attachment invasion locus protein                                | 99                                    |
| 27       | <b>P69991</b> | <b><i>ureB</i></b> | <b>YPTB2943</b> | <b>36.11</b> | <b>144</b>      | <b>15.8</b>           | <b>9.44</b>   | <b>854.41</b>      | <b>Urease subunit beta</b>                                       | <b>100</b>                            |
| 28       | Q66A25        | <i>lpp</i>         | YPTB2307        | 60.26        | 78              | 8.3                   | 8.84          | 402.25             | Major outer membrane lipoprotein                                 | 100                                   |
| 29       | Q669E1        | <i>dps</i>         | YPTB2546        | 22.16        | 167             | 18.9                  | 6.29          | 281.52             | DNA protection during starvation protein                         | 100                                   |
| 31       | <b>P52313</b> | <b><i>ureC</i></b> | <b>YPTB2942</b> | <b>47.03</b> | <b>572</b>      | <b>61.0</b>           | <b>5.81</b>   | <b>1,3911.12</b>   | <b>Urease subunit alpha</b>                                      | <b>100</b>                            |
| 32       | <b>P52313</b> | <b><i>ureC</i></b> | <b>YPTB2942</b> | <b>36.71</b> | <b>572</b>      | <b>61.0</b>           | <b>5.81</b>   | <b>6,969.14</b>    | <b>Urease subunit alpha</b>                                      | <b>100</b>                            |
| 33       | <b>P52313</b> | <b><i>ureC</i></b> | <b>YPTB2942</b> | <b>36.54</b> | <b>572</b>      | <b>61.0</b>           | <b>5.81</b>   | <b>2,857.35</b>    | <b>Urease subunit alpha</b>                                      | <b>100</b>                            |

Identified urease structural and accessory subunit proteins are in bold.

\*Percentage of amino acid sequence identified by matching tryptic peptides.

<sup>†</sup>Number of amino acids in the intact protein.

<sup>‡</sup>Number of matches calculated by comparing query masses with database masses.

<sup>§</sup>Percentage identity to homolog in *Y. pestis* KIM10+.

<sup>¶</sup>The 99% identity of UreD (spot 12) compares the predicted 277-aa truncated protein encoded by the *Y. pestis ureD* pseudogene with the 321-aa UreD of *Y. pseudotuberculosis*.

**Table S2. Primers used in this study**

| Primer                   | Sequence (5'–3')*                                                                | Gene target/primer use                                      |
|--------------------------|----------------------------------------------------------------------------------|-------------------------------------------------------------|
| Fup URE (1)              | CGTAATGGATTTTATTATC                                                              | URE deletion in <i>Y. pseudotuberculosis</i>                |
| Rup URE- Km (2)          | gaagcagctccagcctacacCTGCATAAGCCCTCCTGTATCATG-<br>TTAAGAAAAGTAAAAGTGAGAAAAAGC     |                                                             |
| Fup <i>ureD</i> (3)      | GACGACCGAGGATGCCAAAC                                                             | <i>ureD</i> deletion                                        |
| Rup <i>ureD</i> - Km (4) | gaagcagctccagcctacacCTGTGCATGCCCTGTTCTCCTTCCGGC-<br>TGTACGTGGGTAAACAGGAAATCTC    |                                                             |
| Fdown URE- Km (5)        | ggaccatggctaattcccatGGCGCTGATTTTGCTGTTTTGATGCG-<br>CCATTTTAAGGGGAGAAAAGGGTG      | URE and <i>ureD</i>                                         |
| Rdown URE (6)            | CGGGTCAATGGGTTATTCTG                                                             | Deletion in <i>Y. pseudotuberculosis</i>                    |
| <i>ureD</i> F            | ATTTTCATTGTGGAGGAAGCGG                                                           | <i>ureD</i> PCR                                             |
| <i>ureD</i> R            | GCGTCAAGGCTTTCTACTTTTGG                                                          |                                                             |
| <i>ureD</i> endR         | CGGCGTCTTTACGATCTGCC                                                             | <i>ureG-ureD</i> locus PCR (used with primer <i>ureF</i> F) |
| <i>ureD</i> seqF         | GACGCAGTGGGTGTTATGC                                                              | <i>ureD</i> sequencing                                      |
| <i>ureD</i> seqR         | CCTTAAAAATGGCGCATCAAAACAG                                                        |                                                             |
| <i>ureA</i> F            | CTACACGCTGTCTGATGTGGCG                                                           | <i>ureA-G</i> locus PCR                                     |
| <i>ureA</i> R            | CGTGTACCGTGACCAGACGGC                                                            |                                                             |
| <i>ureB</i> F            | CGTGACCAAAGTTAAAAGTCCG                                                           |                                                             |
| <i>ureB</i> R            | GCGCTCACTGTTGGGTACCAC                                                            |                                                             |
| <i>ureC</i> F            | CGATAGCCTGAATGAATGTGG                                                            |                                                             |
| <i>ureC</i> R            | GAGAACATGGAGATAACGCC                                                             |                                                             |
| <i>ureE</i> F            | CTGGATCTGGGCATTTCTCTCG                                                           |                                                             |
| <i>ureE</i> R            | GTGAAATGTGCAGACCAGAGCC                                                           |                                                             |
| <i>ureF</i> F            | GCATTATCCGTGCTGATTGGG                                                            |                                                             |
| <i>ureF</i> R            | GGTCATTGCCACACCGTATTG                                                            |                                                             |
| <i>ureG</i> F            | GCTGCCGTAGAAGAGATGGAAG                                                           |                                                             |
| <i>ureG</i> R            | CGTGGGTAAACAGGAAATCTC                                                            |                                                             |
| pKD4-KmF                 | GCGATTGTGTAGGCTGGAGCTGCTTC                                                       | PCR of pKD4 <i>km</i> cassette flanked with FRT             |
| pKD4 KmR2                | GCTGACATGGGAATTAGCCATTGGTCC                                                      |                                                             |
| k1                       | CAGTCATAGCCGAATAGCCT                                                             | pKD4 primers to verify correct insertion of <i>km</i> (1)   |
| kt-c                     | GGATTTCATCGACTGTGGCCG                                                            |                                                             |
| Yent Fup URE             | GTAGCTATGGCATTAGCTATAG                                                           | URE deletion in <i>Y. enterocolitica</i> 8081               |
| Yent Rup URE Km          | gaagcagctccagcctacacGCTGCATAAGCCCTCCTGTATCTGGTTAA-<br>GAAAGTAAAAGTGAGAAAAACAACC  |                                                             |
| Yent Fdown URE Km        | ggaccatggctaattcccatGGCGTTAAGGTGTTGCTCAAAGGTATTGG-<br>CGTTGCAGCAAACATCGCTGC      | URE and <i>ureD</i> deletion                                |
| Yent Rdown URE           | CAATGACCGACACGATGCTACC                                                           | In <i>Y. enterocolitica</i>                                 |
| Yent Fup <i>ureD</i>     | GCCTCTGATCATTACCAATGAC                                                           | <i>ureD</i> deletion in <i>Y. enterocolitica</i>            |
| Yent Rup <i>ureD</i> Km  | gaagcagctccagcctacacGCGATGTCATGCATGTTCTCCTTGTGGCT-<br>GCACATGGGTAAACAAGAAGTCGCGC |                                                             |
| Yent <i>ureD</i> F       | GCCGTGTGTACCATGATCTCG                                                            | PCR of internal sequences of <i>ureD</i> and <i>ureF</i>    |
| Yent <i>ureD</i> R       | CGCATCAAATGATTGCATGACC                                                           | in <i>Y. enterocolitica</i>                                 |
| Yent <i>ureF</i> F       | GCCGACGTTAAAAGGCTTCGTG                                                           |                                                             |
| Yent <i>ureF</i> R       | GGCGAACGTGCGCTTTCACATGC                                                          |                                                             |
| <i>ureD</i> ΔG KIM-F     | CCGGCTCATTTTGACATCAAAGGGGGGATGCCCAGCGCGCGACG                                     | Single guanosine deletion in <i>Y. pestis ureD</i>          |
| <i>ureD</i> ΔG KIM-R     | CGTCGCGCCGCTGGCAATCCCCCTTTGATGTCAAATGAGCCGG                                      |                                                             |
| Rdown <i>ureD</i> ΔG     | GCCGGGTTACCTTCACCATAAGC                                                          |                                                             |
| Fup <i>ureD</i> ΔG       | GAAGCGGGCGCTTGTGCTCAGC                                                           |                                                             |

Numbers in parentheses refer to primer indicated in Fig. 2B.

\*Sequences complementary to the kanamycin resistance cassette are in lowercase letters.

1. Datsenko KA, Wanner BL (2000) One-step inactivation of chromosomal genes in *Escherichia coli* K-12 using PCR products. *Proc Natl Acad Sci USA* 97(12):6640–6645.



**Table S4. Bacterial strains and plasmids used in this study**

| Bacterial strain or plasmid                   | Genotype/description                                                                                                                                                                                           | Urease phenotype | Source     |
|-----------------------------------------------|----------------------------------------------------------------------------------------------------------------------------------------------------------------------------------------------------------------|------------------|------------|
| <i>Y. pseudotuberculosis</i>                  |                                                                                                                                                                                                                |                  |            |
| IP32953                                       | Wild type                                                                                                                                                                                                      | +                | (1)        |
| IP $\Delta$ ureD                              | IP32953 deleted of the gene <i>ureD</i> , Km <sup>R</sup>                                                                                                                                                      | -                | This study |
| IP $\Delta$ URE                               | IP32953 deleted of the entire urease cluster ( <i>ureA-ureD</i> ), Km <sup>R</sup>                                                                                                                             | -                | This study |
| IP $\Delta$ URE <sub>KmS</sub>                | IP $\Delta$ URE cured of the Km cassette                                                                                                                                                                       | -                | This study |
| IP $\Delta$ URE(pWKS-URE <sub>pstb</sub> )    | IP $\Delta$ URE <sub>KmS</sub> complemented with the whole urease cluster, Km <sup>R</sup>                                                                                                                     | +                | This study |
| <i>Y. pestis</i>                              |                                                                                                                                                                                                                |                  |            |
| KIM6+                                         | Wild type (pCD-)                                                                                                                                                                                               | -                | (2)        |
| KIM6+(pCRureGD <sub>pstb</sub> )              | KIM6+ expressing the <i>ureG</i> and <i>ureD</i> genes of <i>Y. pseudotuberculosis</i> IP32953 on the pCRXL TOPO TA high-copy plasmid                                                                          | +                | This study |
| KIM6+(pWKS130)                                | KIM6+ containing the empty plasmid pWKS130                                                                                                                                                                     | -                | This study |
| KIM6+(pWKS-URE <sub>pstb</sub> )              | KIM6+ containing the urease cluster of <i>Y. pseudotuberculosis</i> IP32953 on a low-copy plasmid                                                                                                              | +                | This study |
| KIM6+ureD $\Delta$ G                          | KIM6+ deleted of one guanidine residue                                                                                                                                                                         | +                | This study |
| <i>Y. enterocolitica</i>                      |                                                                                                                                                                                                                |                  |            |
| Ye8081                                        | Biotype 1B, wild type                                                                                                                                                                                          | +                | (3)        |
| Ye8081 $\Delta$ ureD                          | <i>Y. ent</i> 8081 deleted of the gene <i>ureD</i> , Km <sup>R</sup>                                                                                                                                           | -                | This study |
| Ye8081 $\Delta$ URE                           | <i>Y. ent</i> 8081 deleted of the entire urease cluster ( <i>ureA-ureD</i> ), Km <sup>R</sup>                                                                                                                  | -                | This study |
| <i>E. coli</i>                                |                                                                                                                                                                                                                |                  |            |
| TOP10                                         | F <sup>-</sup> <i>mcrA</i> $\Delta$ ( <i>mrr-hsdRMS-mcrBC</i> ) $\phi$ 80/ <i>lacZ</i> $\Delta$ M15 $\Delta$ <i>lacX74 deoR recA1 araD139</i> $\Delta$ ( <i>ara-leu</i> )7697 <i>galU galK rpsL endA1 nupG</i> | -                | Invitrogen |
| S17-1 $\lambda$ pir                           | RP4 2-Tc::Mu-Km::Tn7 <i>pro thi recA HsdR</i> <sup>TM+</sup> $\lambda$ pir                                                                                                                                     | -                | (4)        |
| TOP10(pWKS130)                                | <i>E. coli</i> TOP10 containing the empty plasmid pWKS130                                                                                                                                                      | -                | This study |
| TOP10(pWKS-URE <sub>pstb</sub> )              | <i>E. coli</i> TOP10 containing the pWKS130 plasmid carrying the urease cluster of <i>Y. pseudotuberculosis</i> IP32953                                                                                        | +                | This study |
| Plasmids                                      |                                                                                                                                                                                                                |                  |            |
| pKD4                                          | Ap <sup>R</sup> , Km <sup>R</sup>                                                                                                                                                                              | N/A              | (5)        |
| pCP20                                         | Flp recombinase gene, Ap <sup>R</sup> , Cm <sup>R</sup>                                                                                                                                                        | N/A              | (6)        |
| pCVD442                                       | Suicide vector, Ap <sup>R</sup>                                                                                                                                                                                | N/A              | (7)        |
| pWKS130                                       | Low copy plasmid, Km <sup>R</sup>                                                                                                                                                                              | N/A              | (8)        |
| pWKS-URE <sub>pstb</sub>                      | pWKS130 plasmid carrying the <i>Y. pseudotuberculosis</i> IP32953 urease cluster                                                                                                                               | N/A              | This study |
| pCRXL TOPO TA                                 | High-copy plasmid, Ap <sup>R</sup>                                                                                                                                                                             | N/A              | Invitrogen |
| pCRureG-D                                     | pCRXL containing the promoter and bicistronic <i>ureG</i> and <i>ureD</i> genes of IP32953                                                                                                                     | N/A              | This study |
| pCVD- $\Delta$ ureD::Km                       | Suicide vector for deletion of <i>ureD</i> in <i>Y. pstb</i> IP32953                                                                                                                                           | N/A              | This study |
| pCVD- $\Delta$ URE:: Km                       | Suicide vector for deletion of URE in <i>Y. pstb</i> IP32953                                                                                                                                                   | N/A              | This study |
| pCVD- $\Delta$ ureD <sub>Yent</sub> :: Km     | Suicide vector for deletion of <i>ureD</i> in <i>Y. ent</i> 8081                                                                                                                                               | N/A              | This study |
| pCVD- $\Delta$ URE <sub>Yent</sub> :: Km      | Suicide vector for deletion of URE in <i>Y. ent</i> 8081                                                                                                                                                       | N/A              | This study |
| pCVD- <i>ureD</i> $\Delta$ G <sub>KIM6+</sub> | Suicide vector for single nucleotide deletion in <i>Y. pestis</i> KIM6+ <i>ureD</i>                                                                                                                            | N/A              | This study |

N/A, not applicable.

- Chain PS, et al. (2004) Insights into the evolution of *Yersinia pestis* through whole-genome comparison with *Yersinia pseudotuberculosis*. *Proc Natl Acad Sci USA* 101(38):13826–13831.
- Deng W, et al. (2002) Genome sequence of *Yersinia pestis* KIM. *J Bacteriol* 184(16):4601–4611.
- Thomson NR, et al. (2006) The complete genome sequence and comparative genome analysis of the high pathogenicity *Yersinia enterocolitica* strain 8081. *PLoS Genet* 2(12):e206.
- Simon R, Priefer U, Pühler A (1983) A broad range mobilization system for in vivo genetic engineering: Transposon mutagenesis in Gram-negative bacteria. *Biotechnology* 1:784–791.
- Datsenko KA, Wanner BL (2000) One-step inactivation of chromosomal genes in *Escherichia coli* K-12 using PCR products. *Proc Natl Acad Sci USA* 97(12):6640–6645.
- Cherepanov PP, Wackernagel W (1995) Gene disruption in *Escherichia coli*: TcR and KmR cassettes with the option of Flp-catalyzed excision of the antibiotic-resistance determinant. *Gene* 158(1):9–14.
- Donnenberg MS, Kaper JB (1991) Construction of an *eae* deletion mutant of enteropathogenic *Escherichia coli* by using a positive-selection suicide vector. *Infect Immun* 59(12):4310–4317.
- Wang RF, Kushner SR (1991) Construction of versatile low-copy-number vectors for cloning, sequencing and gene expression in *Escherichia coli*. *Gene* 100:195–199.
